# Supplementary material for: Quantification of Bone Fatty Acid Metabolism and Its Regulation by Adipocyte Lipoprotein Lipase
Source: PubMed Central journal article supplement (PMC5486086; doi:10.3390/ijms18061264), 2017-06-13
Supplement: ijms-18-01264-s001.pdf [file ijms-18-01264-s001.pdf]

**Supplementary Table S1**

| Plasma parameter           | WT           | aLKO         |
|----------------------------|--------------|--------------|
| Cholesterol (mg/dl)        | 160 ± 5      | 148 ± 5      |
| Triglycerides (mg/dl)      | 111 ± 5      | 108 ± 4      |
| Alkaline phosphatase (U/L) | 225 ± 12     | 215 ± 13     |
| Osteocalcin (ng/ml)        | 87 ± 7       | 90 ± 10      |
| Osteoprotegerin (ng/ml)    | 1.47 ± 0.19  | 1.33 ± 0.03  |
| RANKL (pg/ml)              | 93 ± 10      | 96 ± 11      |
| DPD per creatinine         | 12.3 ± 1.3   | 11.7 ± 2.5   |
| Calcium (mg/dl)            | 9.72 ± 0.57  | 9.66 ± 0.67  |
| Phosphate (μM)             | 13.98 ± 0.55 | 14.14 ± 0.78 |

**Supplementary Table S2**

| μCT Skeletal parameters | Femur       |             | Tibia       |              |
|-------------------------|-------------|-------------|-------------|--------------|
|                         | WT          | aLKO        | WT          | aLKO         |
| Ct.th (μm)              | 158 ± 3     | 150 ± 2     | 200 ± 2     | 194 ± 5      |
| Ct.Porosity (%)         | 0.52 ± 0.05 | 0.51 ± 0.02 | 0.39 ± 0.04 | 0.37 ± 0.03  |
| TMD (mg HA/ccm)         | 1,140 ± 16  | 1,144 ± 4   | 1,142 ± 5   | 1,134 ± 3    |
| BV/TV (%)               | 6.89 ± 0.38 | 6.20 ± 0.57 | 9.89 ± 0.38 | 10.15 ± 0.54 |
| Tb.N (per mm)           | 3.63 ± 0.09 | 3.55 ± 0.11 | 3.81 ± 0.12 | 3.92 ± 0.19  |
| Tb.Th (μm)              | 45.0 ± 1.1  | 42.8 ± 1.2  | 46.5 ± 1.0  | 44.8 ± 1.4   |
| Tb.Sp (μm)              | 276 ± 7     | 282 ± 8     | 265 ± 9     | 257 ± 14     |
